# Supplementary material for: Obsessive-compulsive symptoms in two patients with strategic basal ganglia lesions
Source: PubMed Central journal article supplement (PMC9908536; doi:10.1038/s41380-022-01853-8), 2022-11-10
Supplement: 41380_2022_1853_MOESM1_ESM.pdf [file 41380_2022_1853_MOESM1_ESM.pdf]

## SUPPLEMENTAL TABLE

|                                                                                                                                                                                                                                                                                                                                          | Case 1: Female, 30 years old                                                                                                                                                                                                                              | Case 2: Female, 26 years old                                                                                                                                                                                                                                                                                                                                                     |
|------------------------------------------------------------------------------------------------------------------------------------------------------------------------------------------------------------------------------------------------------------------------------------------------------------------------------------------|-----------------------------------------------------------------------------------------------------------------------------------------------------------------------------------------------------------------------------------------------------------|----------------------------------------------------------------------------------------------------------------------------------------------------------------------------------------------------------------------------------------------------------------------------------------------------------------------------------------------------------------------------------|
| <b>Initial Y-BOCS and OCI-R scores</b>                                                                                                                                                                                                                                                                                                   | 27<br>33                                                                                                                                                                                                                                                  | 16<br>27                                                                                                                                                                                                                                                                                                                                                                         |
| <b>Serum antibodies and immunological markers</b><br>Anti-thyroid antibodies (against TPO, TG and TSH-receptor)<br><br>ANAs (on HEp-2 cells), ANCA (on EthOH- /formalin-fixed neutrophils), APAs, SMA<br>Complement factors (C3, C4)<br>IgG, IgM and IgA levels<br><br>CRP<br>Sarcoidosis parameters (IL2-R, neopterin, ACE)             | <b>Anti-TPO 78.1 IU/ml (ref. &lt;34 IU/ml); TG-antibodies 201 IU/ml (ref. &lt;115 IU/ml)</b> , TSH-receptor antibodies negative<br><b>ANAs (HEp-2 (nucleus 1:50)) a trace homogeneous</b> , ANCA /APAs negative<br>Normal<br>Normal<br>Normal<br>Negative | Negative<br><br>ANAs/ANCA/APAs negative, <b>SMA trace positive</b><br>Normal<br>IgA slightly decreased (0.65 g/l; ref.: 0.7-4g/l)<br>Normal<br>Negative                                                                                                                                                                                                                          |
| <b>Pathogens</b><br>Serology for Lyme disease, lues                                                                                                                                                                                                                                                                                      | Negative                                                                                                                                                                                                                                                  | Negative                                                                                                                                                                                                                                                                                                                                                                         |
| <b>Neuronal autoantibodies</b><br>Paraneoplastic IgG antibodies against intracellular antigens<br>Well-characterized neuronal IgG cell surface antibodies<br>Anti-MOG/AQP4-IgG antibodies                                                                                                                                                | Negative<br>Negative<br>Negative                                                                                                                                                                                                                          | Negative<br>Negative<br>Negative                                                                                                                                                                                                                                                                                                                                                 |
| Tissue based assay on unfixed murine brain tissue (Prof. Prüss, Charité Berlin)                                                                                                                                                                                                                                                          | Slightly positive anti-nuclear antibody pattern                                                                                                                                                                                                           | Moderate fine granular IgG binding against brain tissue, which is most likely to resemble anti-nuclear binding and is not expected to be pathogenic a.e. due to intracellular localization                                                                                                                                                                                       |
| <b>Cerebrospinal fluid</b><br>White blood cell count<br>Protein concentration<br>Albumin quotient<br>IgG-index<br>Oligoclonal bands in serum/CSF<br>Local IgG/IgA/IgM synthesis<br>Lactate<br>MRZ reaction<br>Well-characterized neuronal IgG cell surface antibodies<br>Tissue based assay on unfixed murine brain tissue (Prof. Prüss) | 1/μL (ref.: <5/μL)<br>431 mg/L (ref.: <450 mg/L)<br><b>7.0 (ref.: &lt;6.0)</b><br>0.46 (ref.: <0.7)<br>Negative<br>Negative<br><b>1.15 mg/l (ref.: 1.5-2.1 mg/l)</b><br>Negative<br>Negative<br>Slightly positive anti-nuclear antibody pattern           | 1/μL (ref.: <5/μL)<br>189 mg/L (ref.: <450 mg/L)<br>2.3 (ref.: <5.7)<br>0.52 (ref.: <0.7)<br>Negative<br>Negative<br><b>2.58 mg/l (ref.: 1.5-2.1 mg/l)</b><br>Negative<br>Negative<br>Moderate fine granular IgG binding against brain tissue, which is most likely to resemble anti-nuclear binding and is not expected to be pathogenic a.e. due to intracellular localization |
| <b>MRI</b>                                                                                                                                                                                                                                                                                                                               | <b>Lesion in the caudate nucleus on the right side</b>                                                                                                                                                                                                    | <b>FLAIR-hyperintense lesion in the globus pallidus on the right side</b>                                                                                                                                                                                                                                                                                                        |
| <b>EEG</b><br>Visual Assessment                                                                                                                                                                                                                                                                                                          | No intermittent/ generalized slowing, no epileptic activity                                                                                                                                                                                               | No intermittent/ generalized slowing, no epileptic activity                                                                                                                                                                                                                                                                                                                      |

|                                |                                                                                                                                                                                                                                                      |                                                                                                                                                                   |
|--------------------------------|------------------------------------------------------------------------------------------------------------------------------------------------------------------------------------------------------------------------------------------------------|-------------------------------------------------------------------------------------------------------------------------------------------------------------------|
| Automated ICA                  | Alpha at 10.5Hz, clear mu-rhythms on both sides at 10.9 and 22.3Hz; spikes that can be traced back to eye muscles; <b>distinct frontocentral theta (suggestive of sleepiness), this leads to IRDA detections that decrease with hyperventilation</b> | <b>Lots of frontocentral theta (even peak at 5Hz)</b> , alpha at 10.15 and mu 12.1Hz, but no clear IRDAs                                                          |
| Neuroophthalmology             | Decimal visual acuity right 1.3, visual acuity left 0.86<br>Macula/optic disc in OCT normal                                                                                                                                                          | Decimal visual acuity right 1.73, visual acuity left 1.37<br><b>Macula in OCT: slightly flattened foveal depression on both sides</b><br>Optic disc in OCT normal |
| 24h blood pressure measurement | Normal                                                                                                                                                                                                                                               | Normal                                                                                                                                                            |
| Lactate ischemia test          | n.a.                                                                                                                                                                                                                                                 | Normal                                                                                                                                                            |
| Stroke screening               | 24h ECG n.a.<br>TTE n.a.<br>Neurosography (of cervical/brain) vessels n.a.                                                                                                                                                                           | Normal<br>Normal<br>Normal                                                                                                                                        |

**Supplemental Table 1: Diagnostic findings in both patients (all pathological findings are marked in bold).**

Abbreviations: ACE, angiotensin-converting enzyme; ANAs, antinuclear antibodies; ANCAs, anti-neutrophil cytoplasmic antibodies; AQP-4, aquaporin 4 APAs, antiphospholipid antibodies; CSF, cerebrospinal fluid; CRP, C-reactive protein; ECG, electrocardiography; EEG, electroencephalography; HEp-2, Human Epithelioma-2, ICA, independent component analysis; Ig, immunoglobulin; IL2-R, interleukin 2 receptor; IRDA, intermittent rhythmic delta activity; MRI, magnetic resonance imaging; MRZ, antibody indices against measles, rubella, and varicella zoster virus; n.a., not available; ref., reference; OCI-R, Obsessive Compulsive Inventory – Revised; OCT, optical coherence tomography; SMA, smooth muscle actin; TG, thyroglobulin; TPO, thyroid peroxidase; TSH, thyroid-stimulating hormone receptor; TTE, transthoracic echocardiography; Y-BOCS, Yale-Brown Obsessive and Compulsive Scale.
